# Supplementary material for: Cofilin-mediated sorting and export of specific cargo from the Golgi apparatus in yeast
Source: PubMed Central journal article supplement — Mol Biol Cell. 2012 Jun 15;23(12):2327–38. doi: 10.1091/mbc.E11-09-0826 (PMC3374751; doi:10.1091/mbc.e11-09-0826), 2012-06-15

**Figure S1.**

A. Cells were grown to logarithmic phase at 25 or 30°C. Cells grown at 25°C were also shifted to 37°C for 2 hours. Equal cell numbers were treated to generate spheroplasts, and the cell wall was analyzed by western blot to determine the amount of extracellular Bgl2. Total Bgl2 was determined by solubilising equal number of non-spheroplasted cells in SDS sample buffer.

B. The indicated strains were grown to logarithmic phase at 25 or 30°C. Cells grown at 25°C were also shifted to 37°C for 2 hours. Equal cell number were treated to generate spheroplasts, washed to remove the cell wall and analyzed by western blot to determine the amount of intracellular Bgl2.

**Figure S2.**

Wild type and *cof1-8* cells grown at 30°C were fractionated on a continuous 30-60% sucrose gradient. Bgl2 location with respect to ER and Golgi membrane was determined by western blot. ER and Golgi membrane containing fractions were detected by western blot of Kar2 and Mnn9, respectively. Quantitation of protein present in each fraction and relative percentages were determined for three independent experiments. These were analyzed and plotted using GraphPad Prism software. Error bars represent SEM.

**Figure S3.**

A. Invertase secretion was determined in the indicated strains by measuring enzymatic activity in external versus total fractions of cells. Percentage of extracellular versus total was determined for 8 independent experiments. Error bars represent SEM.

B. Pma1-GFP was expressed exogenously in wild type and *cof1-8* cells. Localization was determined in live cells grown to logarithmic phase at 30°C. Scale bar = 5μM

Figure S1

A

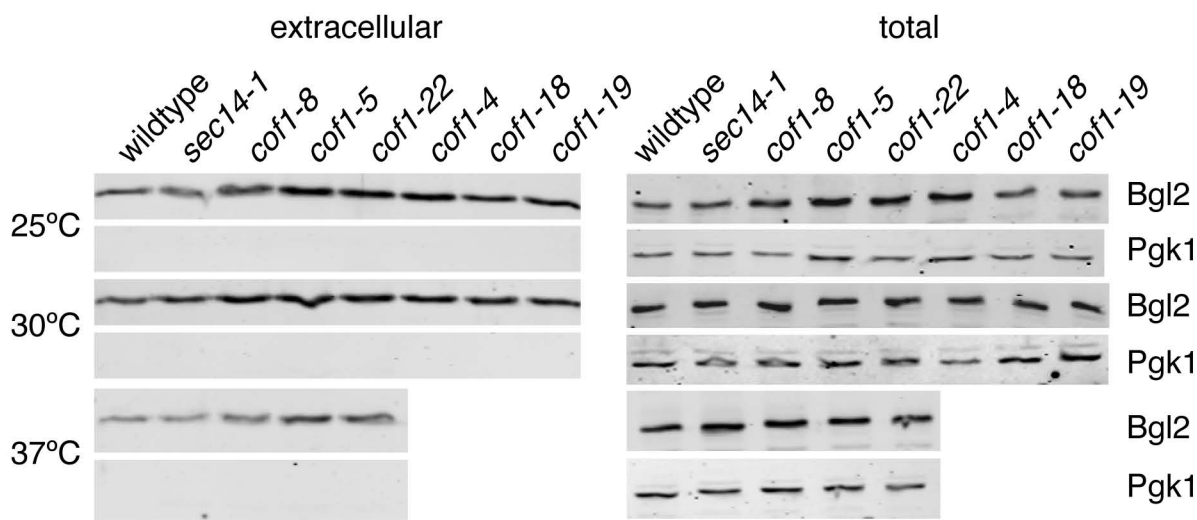

B

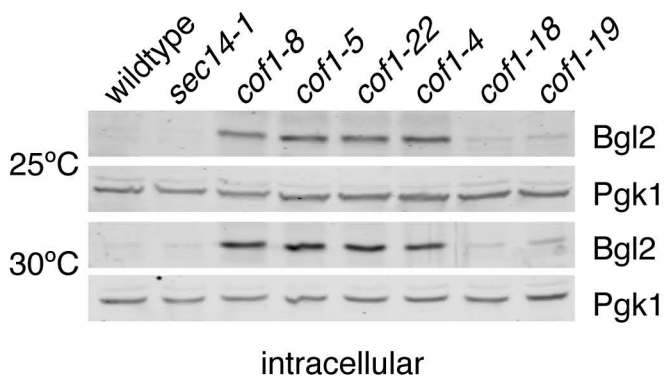

Figure S2

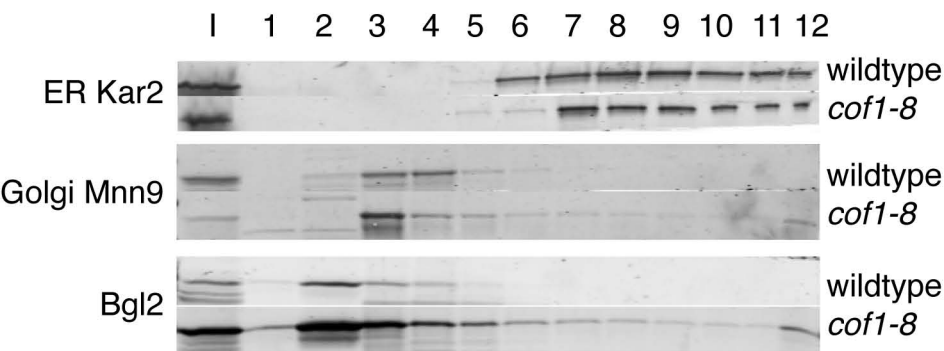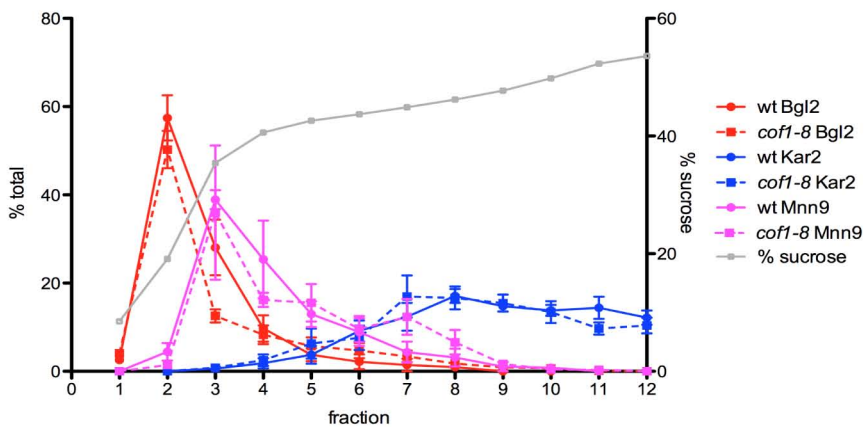

Figure S3

A

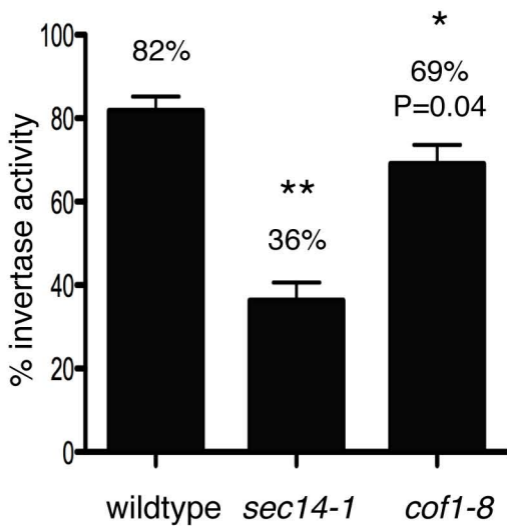

B

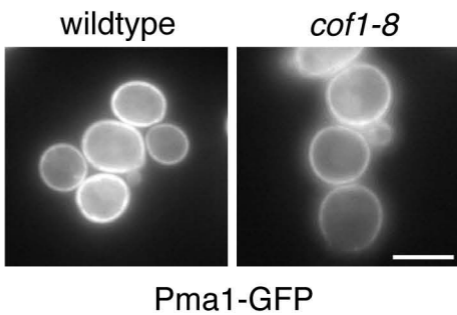

Supplement: supp_E11-09-0826v1_CombinedSupMats.pdf [file supp_E11-09-0826v1_CombinedSupMats.pdf]
